# Supplementary material for: Wind turbine gearbox operation monitoring using high-resolution distributed fiber-optic sensing
Source: Copernicus journal article supplement (doi:10.5194/wes-10-1763-2025), 2025-09-01
Supplement: Supplementary file 1 [file wes-10-1763-2025-supplement.zip]

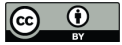

## *Supplement of*

# **Wind turbine gearbox operation monitoring using high-resolution distributed fiber-optic sensing**

**Linqing Luo et al.**

*Correspondence to:* Linqing Luo ([linqingluo@lbl.gov](mailto:linqingluo@lbl.gov))

- [wes-10-1763-2025-supplement-title-page.pdf](#)
- [Gearbox Rotation.mp4](#)

The copyright of individual parts of the supplement might differ from the article licence.
